# Supplementary material for: Unique Schrödinger semimetal state in ternary Be2P3N honeycomb lattice
Source: Royal Society of Chemistry journal article supplement (doi:10.1039/c8tc04813d), 2018-12-03
Supplement: c8tc04813d1.pdf [file c8tc04813d1.pdf]

Supplementary Information for

**Unique Schrödinger Semimetal State in Ternary  
Be<sub>2</sub>P<sub>3</sub>N Honeycomb Lattice**

Lingbiao Meng, Yingjuan Zhang, Shuang Ni, Bo Li and Weidong Wu

**1. Computational methods for carrier mobility**

Under effective mass approximation, the acoustic-phonon-limited carrier mobility ( $\mu$ ) for 2D materials in the deformation potential (DP) theory [Phys. Rev. 1950, 80, 72] is expressed as:

$$\mu = \frac{2e\hbar^3 C}{3k_B T (m^*)^2 E_1^2}$$

where T is the temperature and  $m^*$  is the effective mass of the carrier along the transport direction;  $E_1 = \Delta v / (\Delta l / l_0)$  is the DP constant, where  $\Delta v$  represents the shift of band edges under proper cell compression and dilatation,  $l_0$  is the lattice constant in the transport direction, and  $\Delta l$  is its deformation;  $C = (\partial^2 E / \partial \delta^2) / S_0$  is the elastic modulus, where  $E$  is the total energy of the cell and  $\delta$  the applied strain while  $S_0$  is the area of the cell. The PBE functional was adopted in the estimations.

## 2. Table S1-S2

**Table S1:** Calculated bandgaps of candidate structures with Be, Mg, Zn, P and N in initial material design.

|    | Structure                                                                          | System (X=Be, Mg, Zn)              | Bandgap (eV) |
|----|------------------------------------------------------------------------------------|------------------------------------|--------------|
| C1 | 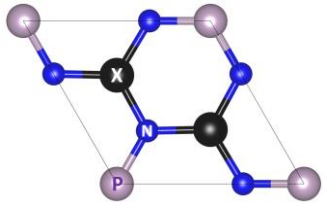  | Be <sub>2</sub> -N <sub>3</sub> -P | 3.850        |
|    |                                                                                    | Mg <sub>2</sub> -N <sub>3</sub> -P | 2.698        |
|    |                                                                                    | Zn <sub>2</sub> -N <sub>3</sub> -P | 2.664        |
| C2 |   | Be <sub>2</sub> -P <sub>3</sub> -N | 0.000        |
|    |                                                                                    | Mg <sub>2</sub> -P <sub>3</sub> -N | 0.089        |
|    |                                                                                    | Zn <sub>2</sub> -P <sub>3</sub> -N | 0.000        |
| C3 |  | Be <sub>2</sub> -N-P <sub>3</sub>  | 0.588        |
|    |                                                                                    | Mg <sub>2</sub> -N-P <sub>3</sub>  | 1.346        |
|    |                                                                                    | Zn <sub>2</sub> -N-P <sub>3</sub>  | 1.00         |

**Table S2.** Predicted deformation potential constant ( $E_1$ ), 2D elastic modulus ( $C$ ), effective mass ( $m^*$ ) and mobility ( $\mu$ ) for electron and hole at 300 K. The vacuum level was set to zero for reference.

| Carrier type | $E_1$ (eV) | $C$ (N/m) | $m^*(m_e)$ | $\mu(\times 10^3 \text{cm}^2/\text{V/s})$ |
|--------------|------------|-----------|------------|-------------------------------------------|
| <i>e</i>     | -1.20      | 90        | 0.31       | 11.3                                      |
| <i>h</i>     | -1.65      | 90        | -0.92      | 0.58                                      |

### 3. Figure S1-S6

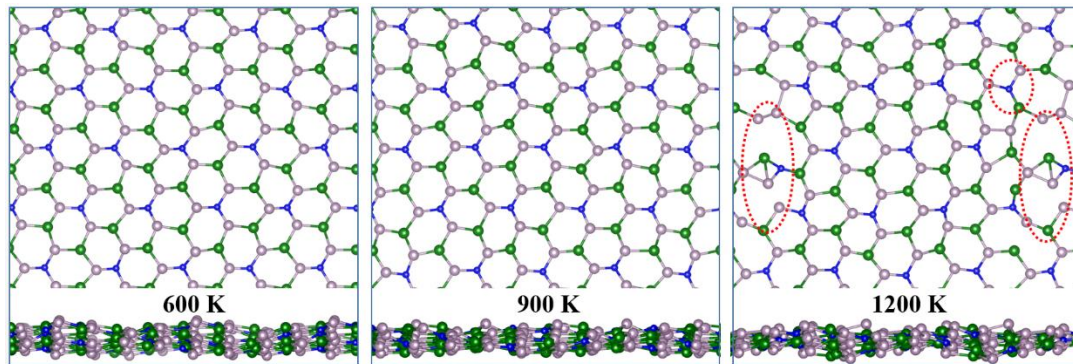

**Figure S1.** Snapshots of the final frame of FPMD of Be<sub>2</sub>P<sub>3</sub>N monolayer from 600, 900 and 1200 K (top and side views). The melted local structures at 1200 K are indicated in red-dot circles for clarity.

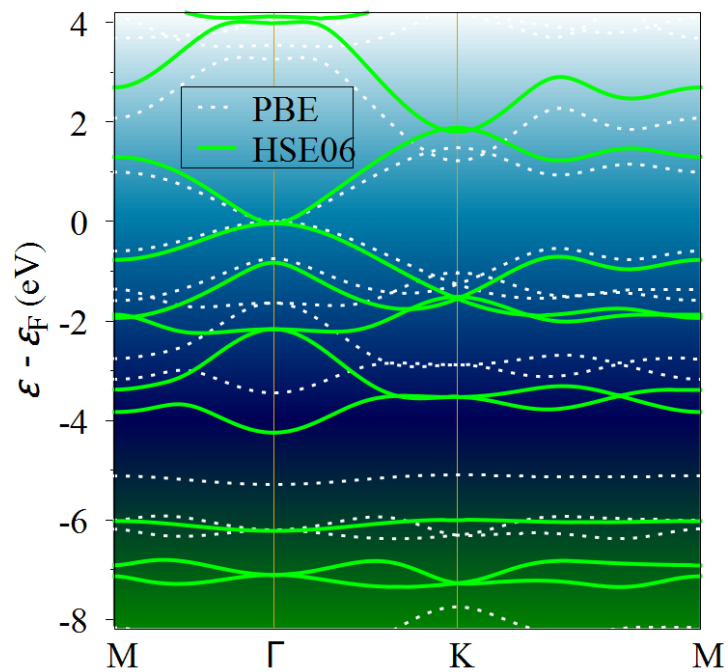

**Figure S2.** Band structures computed by HSE06 and PBE functionals. Note that the two functionals predict very similar band dispersions and zero bandgaps at  $\Gamma$  point.

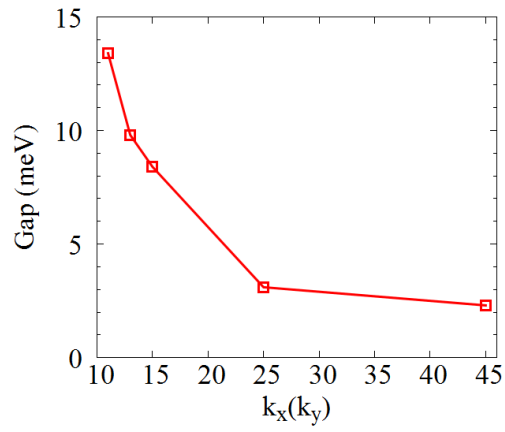

**Figure S3.** The SOC effect on bandgap opening calculated with different samplings of k-point density ( $11 \times 11 \times 1$ ,  $13 \times 13 \times 1$ ,  $15 \times 15 \times 1$ ,  $25 \times 25 \times 1$  and  $45 \times 45 \times 1$ ). Considering the tendency, the ultimate SOC effect on bandgap opening will be further decreased, while may not be null.

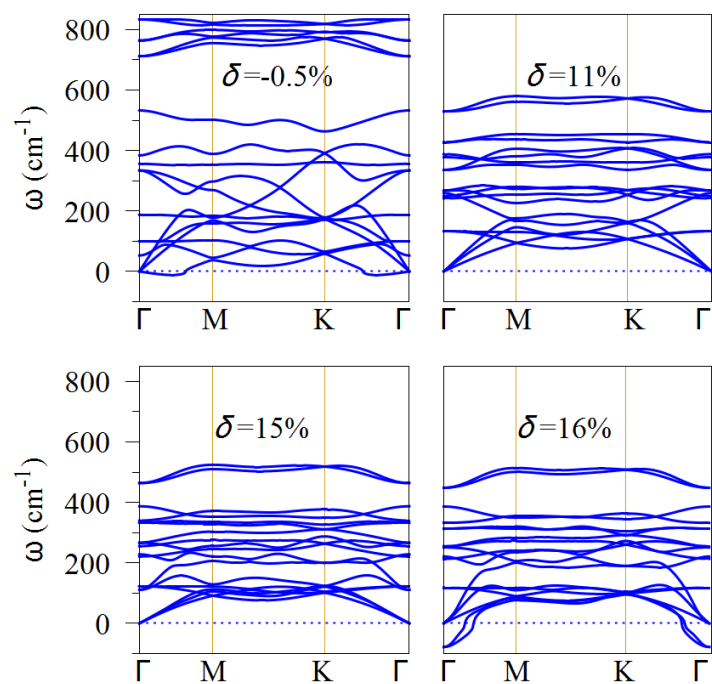

**Figure S4.** Phonon dispersions of Be<sub>2</sub>P<sub>3</sub>N monolayer under different biaxial strains.

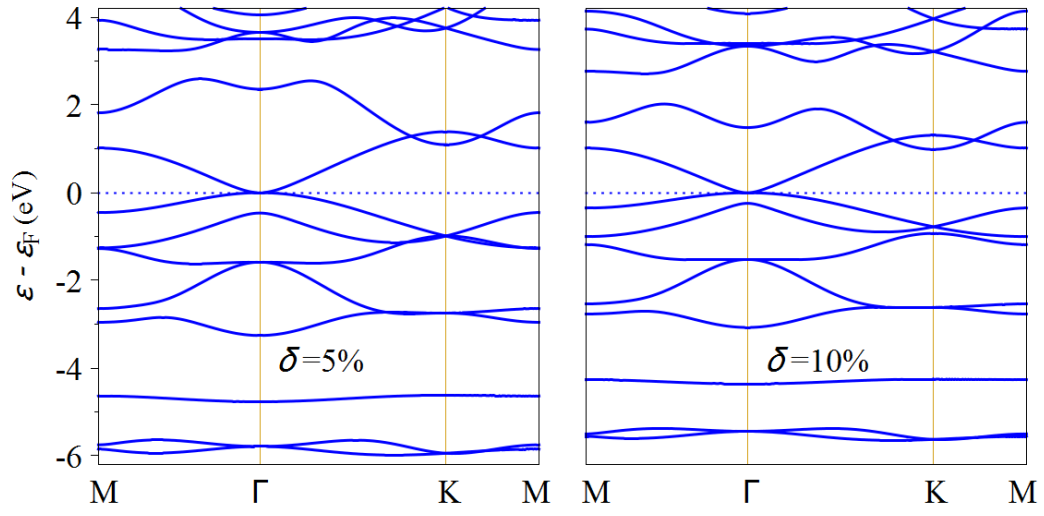

**Figure S5.** Band structures of Be<sub>2</sub>P<sub>3</sub>N monolayer under different biaxial strains.



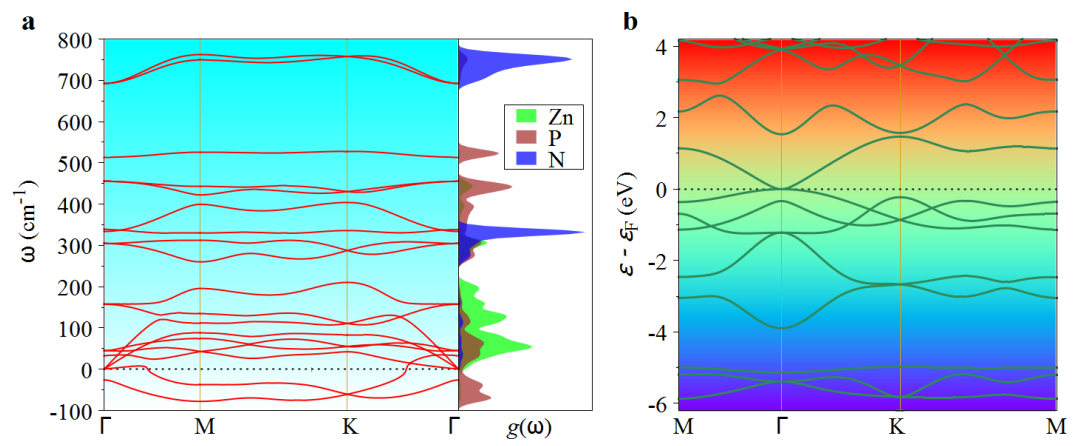

**Figure S6.** Phonon dispersion (a) and band structure (b) of Zn<sub>2</sub>P<sub>3</sub>N monolayer.
